# Supplementary material
Source: publisher figshare collection journal article supplement (https://karger.figshare.com/ndownloader/files/8717881)
Supplement: Supplementary file 1 [file 8717881]

**SUPPLEMENTARY MATERIALS**

Table e1: Multivariate analysis for predictors of symptomatic vasospasm requiring repetitive endovascular treatments

| **Parameter** | **OR (95% CI)** | **p-value** |
| --- | --- | --- |
| Age, per-year-increase | 0.96 (0.92 – 0.99) | **0.003** |
| Hunt & Hess grade, 4 or 4 | 1.16 (0.51 – 2.67) | 0.725 |
| Fisher grade, 3 or 4 | 0.98 (0.33 – 2.92) | 0.972 |
| FMD | 3.95 (2.20 – 7.08) | **0.019** |
| Need for EVD | 2.84 (1.02 – 7.92) | 0.050 |

Table e2: Multivariate analysis for predictors of risk for multiple infarction among individuals with cerebral infarction

| **Parameter** | **OR (95% CI)** | **p-value** |
| --- | --- | --- |
| Age, per-year-increase | 1.00 (0.98 – 1.02) | 0.956 |
| Hunt & Hess grade, 4 or 4 | 1.80 (1.02 – 3.15) | **0.041** |
| Fisher grade, 3 or 4 | 2.11 (0.76 – 5.89) | 0.154 |
| EAVS | 2.04 (1.01 – 4.13) | **0.047** |
| Need for EVD | 1.70 (0.88 – 3.30) | 0.117 |

Table e3: Multivariate analysis for predictors of symptomatic vasospasm requiring spasmolysis

| **Parameter** | **OR (95% CI)** | **p-value** |
| --- | --- | --- |
| Age, per-year-increase | 0.99 (0.97 – 1.02) | 0.533 |
| Hunt & Hess grade, 4 or 4 | 0.86 (0.47 – 1.56) | 0.617 |
| Fisher grade, 3 or 4 | 2.24 (0.90 – 5.59) | 0.083 |
| EAVS | 5.24 (2.66 – 10.32) | **<0.0001** |
| Need for EVD | 0.78 (0.41 – 1.49) | 0.449 |
| Vasospasm on TCD | 8.90 (3.74 – 21.18) | **<0.0001** |

Table e4: Multivariate analysis for predictors of symptomatic vasospasm requiring angioplasty

| **Parameter** | **OR (95% CI)** | **p-value** |
| --- | --- | --- |
| Age, per-year-increase | 0.97 (0.94 – 0.99) | **0.018** |
| Hunt & Hess grade, 4 or 4 | 1.19 (0.62 – 2.31) | 0.598 |
| Fisher grade, 3 or 4 | 1.69 (0.60 – 4.78) | 0.321 |
| EAVS | 2.56 (1.20 – 5.49) | **0.015** |
| Need for EVD | 1.93 (0.84 – 4.47) | 0.123 |
| Vasospasm on TCD | 6.44 (2.05 – 20.18) | **0.001** |

Table e5: Multivariate analysis for predictors of symptomatic vasospasm requiring repetitive endovascular treatments

| **Parameter** | **OR (95% CI)** | **p-value** |
| --- | --- | --- |
| Age, per-year-increase | 0.97 (0.94 – 1.00) | 0.076 |
| Hunt & Hess grade, 4 or 4 | 1.15 (0.50 – 2.65) | 0.741 |
| Fisher grade, 3 or 4 | 0.84 (0.27 – 2.57) | 0.758 |
| EAVS | 4.71 (2.03 – 10.95) | **<0.0001** |
| Need for EVD | 1.93 (0.68 – 5.50) | 0.216 |
| Vasospasm on TCD | 384.41 (-) | 0.996 |

Table e6: Multivariate analysis for predictors of FMD signs on admission DSA

| **Parameter** | **OR (95% CI)** | **p-value** |
| --- | --- | --- |
| Hunt & Hess grade, 4 or 5 | 3.54 (1.49 – 8.41) | 0.004 |
| Sex (female) | 3.65 (1.06 – 12.54) | 0.040 |
